# Supplementary figures and images for: Controlled photochemical reaction of 4-oxo(phenylacetyl)morpholine and 1-(phenylglyoxylyl)piperidine in solid supramolecular systems
Source: Royal Society of Chemistry journal article supplement (doi:10.1039/b715981a), 2008-01-01

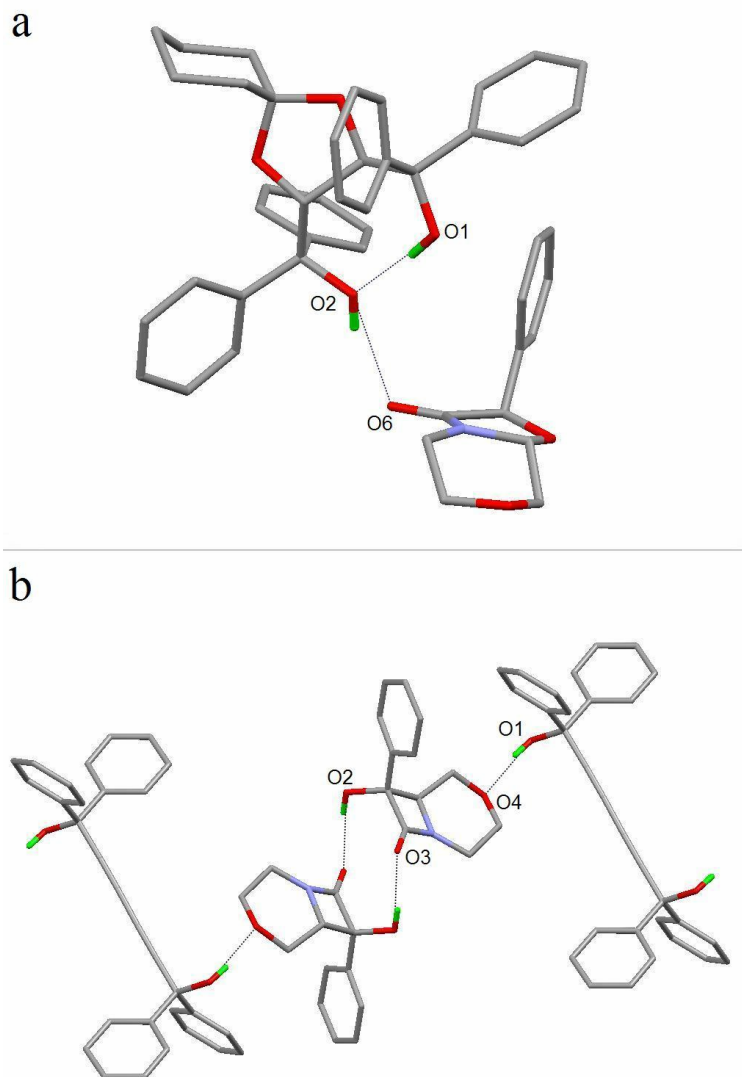

**Fig. S1** Hydrogen bonding in inclusion compounds (a) **I-a''** and (b) **II-a'**.

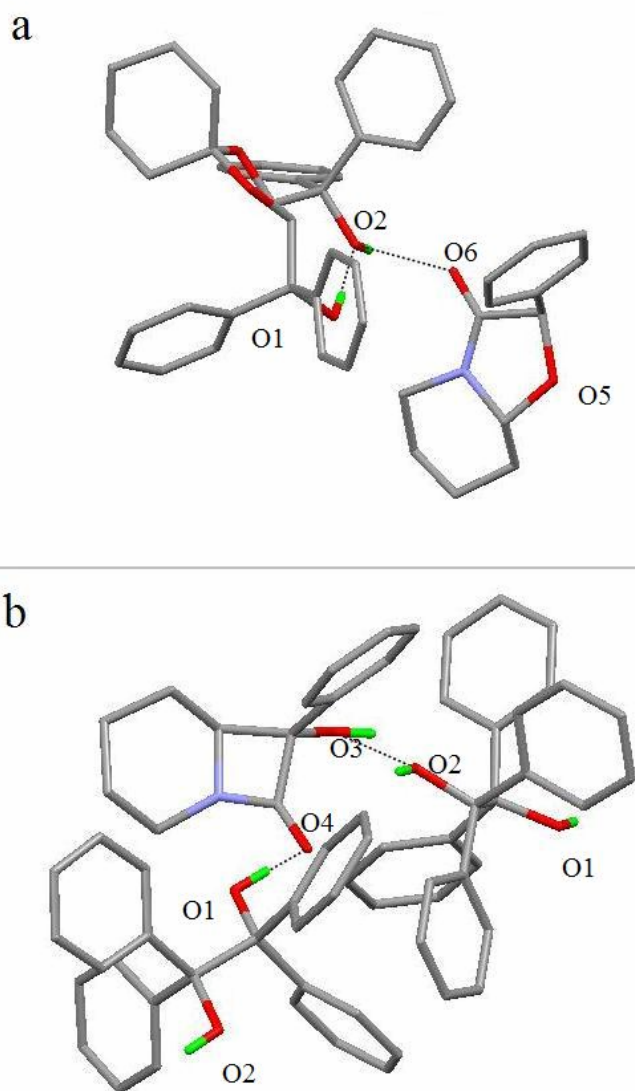

**Fig. S2** Compounds (a) I-b'' and (b) V-b'.

Supplement: b715981a.pdf [file b715981a.pdf]
